# Supplementary material
Source: ML conference proceedings conference paper supplement (https://openaccess.thecvf.com/content/WACV2022/html/Chen_Video_Salient_Object_WACV_2022_paper.html)
Supplement: Supplementary file 2 [file Chen_Video_Salient_Object_WACV_2022_supplemental.zip]

Archive with 3 entries (2 files):
- 0486-supp/
- 0486-supp/0486-supp.avi
- 0486-supp/0486-supp.pdf
